# Supplementary material for: DeepM6ASeq: prediction and characterization of m6A-containing sequences using deep learning
Source: Springer Nature journal article supplement (doi:10.1186/s12859-018-2516-4), 2018-12-01
Supplement: 12859_2018_2516_MOESM1_ESM.pdf [file 12859_2018_2516_MOESM1_ESM.pdf]

**Table S1 Optimization of hyperparameters of DeepM6ASeq**

| Hyper-parameter             | Choices                   |
|-----------------------------|---------------------------|
| Maxpooling                  | 0,2                       |
| Dropout ratio               | 0.25,0.5                  |
| Output units of BLSTM layer | $32 \times 2,64 \times 2$ |
| Neurons of FC layer*        | 32,64                     |
| Learning rate               | 0.01,0.001                |

\*Number of neurons corresponds to 1/2 output units of BLSTM layer

**Table S2 Hyperparameter optimization for other classifiers**

| Classifiers | Hyper-parameters optimization                                                |
|-------------|------------------------------------------------------------------------------|
| RF          | tree number: 300,400,500,600,700,800,900                                     |
| LR          | regularization strength: 0.001, 0.01, 0.1, 1, 10, 100, 1000; penalty: L1, L2 |
| SVM         | C: 1,10,100; gamma: 0.01,0.001; kernel: linear, polynomial, rbf              |

**Table S3 Metrics of mean performance for tuning of hyperparameters**

|         | Maxpooling | Dropout | Layers          | Learning rate | AUROC        | AUPR         | Accuracy     | MCC          | F1-score     |
|---------|------------|---------|-----------------|---------------|--------------|--------------|--------------|--------------|--------------|
| Model1  | 0          | 0.25    | BLSTM:32; FC:32 | 0.001         | 0.846        | 0.833        | 0.768        | 0.538        | 0.775        |
| Model2  | 0          | 0.25    | BLSTM:32; FC:32 | 0.01          | 0.847        | 0.834        | 0.770        | 0.541        | 0.775        |
| Model3  | 0          | 0.25    | BLSTM:64; FC:64 | 0.001         | 0.847        | 0.835        | 0.771        | 0.543        | 0.777        |
| Model4  | 0          | 0.25    | BLSTM:64; FC:64 | 0.01          | 0.846        | 0.833        | 0.769        | 0.540        | 0.777        |
| Model5  | 0          | 0.5     | BLSTM:32; FC:32 | 0.001         | 0.848        | 0.835        | 0.772        | 0.544        | 0.776        |
| Model6  | 0          | 0.5     | BLSTM:32; FC:32 | 0.01          | 0.847        | 0.834        | 0.770        | 0.542        | 0.778        |
| Model7  | 0          | 0.5     | BLSTM:64; FC:64 | 0.001         | <b>0.850</b> | <b>0.838</b> | 0.772        | <b>0.546</b> | 0.777        |
| Model8  | 0          | 0.5     | BLSTM:64; FC:64 | 0.01          | 0.849        | 0.836        | <b>0.773</b> | <b>0.546</b> | <b>0.780</b> |
| Model9  | 2          | 0.25    | BLSTM:32; FC:32 | 0.001         | 0.844        | 0.830        | 0.767        | 0.536        | 0.776        |
| Model10 | 2          | 0.25    | BLSTM:32; FC:32 | 0.01          | 0.843        | 0.830        | 0.768        | 0.536        | 0.774        |
| Model11 | 2          | 0.25    | BLSTM:64; FC:64 | 0.001         | 0.844        | 0.832        | 0.767        | 0.535        | 0.775        |
| Model12 | 2          | 0.25    | BLSTM:64; FC:64 | 0.01          | 0.844        | 0.831        | 0.767        | 0.535        | 0.772        |
| Model13 | 2          | 0.5     | BLSTM:32; FC:32 | 0.001         | 0.848        | 0.836        | 0.771        | 0.543        | 0.777        |
| Model14 | 2          | 0.5     | BLSTM:32; FC:32 | 0.01          | 0.846        | 0.832        | 0.770        | 0.541        | 0.776        |
| Model15 | 2          | 0.5     | BLSTM:64; FC:64 | 0.001         | 0.849        | 0.836        | 0.771        | 0.542        | 0.776        |
| Model16 | 2          | 0.5     | BLSTM:64; FC:64 | 0.01          | 0.847        | 0.834        | 0.770        | 0.541        | 0.774        |

**Table S4 Performance metrics for comparison of DeepM6ASeq with other classifiers on the mammalian unbalanced independent dataset**

|                        | Accuracy     | F1-score     | AUROC        | AUPR         | MCC          |
|------------------------|--------------|--------------|--------------|--------------|--------------|
| DeepM6ASeq             | <b>0.763</b> | <b>0.687</b> | <b>0.841</b> | <b>0.725</b> | <b>0.505</b> |
| Random Forest          | 0.732        | 0.667        | 0.822        | 0.692        | 0.466        |
| Logistic Regression    | 0.750        | 0.662        | 0.821        | 0.694        | 0.469        |
| Support Vector Machine | 0.740        | 0.654        | 0.815        | 0.687        | 0.453        |

The highest value for each accuracy measure is highlighted in bold.

**Table S5 Prediction scores at different confidence thresholds for species models**

|           | Moderate* | High* | Very high* |
|-----------|-----------|-------|------------|
| Mammalian | 0.725     | 0.818 | 0.929      |
| Human     | 0.772     | 0.841 | 0.920      |
| Mouse     | 0.724     | 0.813 | 0.890      |
| Zebrafish | 0.715     | 0.820 | 0.90       |

\*Moderate, High and Very high correspond to 90%, 95% and 99% specificity respectively.
